# Supplementary material for: Gestational Exercise Antagonises the Impact of Maternal High-Fat High-Sucrose Diet on Liver Mitochondrial Alterations and Quality Control Signalling in Male Offspring
Source: MDPI journal article supplement (doi:10.3390/ijerph20021388), 2023-01-12
Supplement: s1 [file s1]

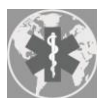

**Supplementary Table S1.** List of antibodies and dilutions used in the western blotting.

| Antibody                                      | Manufacturer           | Dilution |
|-----------------------------------------------|------------------------|----------|
| Bax                                           | Cell Signaling, #2772  | 1:1000   |
| Bcl2                                          | Cell Signaling, #2870  | 1:1000   |
| Beclin1                                       | Cell Signaling, #3495  | 1:750    |
| ChREBP                                        | Santa Cruz, sc-515922  | 1:800    |
| Cytochrome C                                  | BD Biosciences, 556433 | 1:1000   |
| DRP1                                          | Cell Signaling, #8570  | 1:500    |
| ER $\alpha$                                   | Santa Cruz, sc-787     | 1:500    |
| LC3                                           | MBL, PD014             | 1:750    |
| MFN1                                          | Santa Cruz, sc-50440   | 1:500    |
| MFN2                                          | Santa Cruz, sc-50331   | 1:500    |
| OPA1                                          | Abcam, ab119685        | 1:750    |
| Parkin                                        | Cell Signaling, #4211  | 1:500    |
| PEPCK-C                                       | Santa Cruz, sc-377027  | 1:500    |
| PGC-1 $\alpha$                                | Abcam, ab54481         | 1:1000   |
| PINK1                                         | Abcam, ab23707         | 1:750    |
| SREBP-1                                       | Abcam, ab3259          | 1:1000   |
| TFAM                                          | Santa Cruz, sc-23588   | 1:500    |
| TOM20                                         | Santa Cruz, sc-11415   | 1:1000   |
| horseradish peroxidase-conjugated anti-goat   | Santa Cruz, sc-2354    | 1:8500   |
| horseradish peroxidase-conjugated anti-mouse  | Santa Cruz, sc-2005    | 1:10000  |
| horseradish peroxidase-conjugated anti-rabbit | Santa Cruz, sc-2357    | 1:5000   |

ChREBP - carbohydrate response element binding protein.

DRP1 - dynamin related protein 1.

ER $\alpha$  - estrogen receptor alpha.

LC3 - microtubule-associated protein-1 light chain 3.

MFN1- mitofusin 1.

MFN2 - mitofusin 2.

OPA1 - optic atrophy 1.

PEPCK-C - phosphoenolpyruvate carboxykinase, cytosolic.

PGC-1 $\alpha$  - peroxisome proliferator-activated receptor gamma co-activator-1alpha.

PINK1 - PTEN Induced Kinase 1.

SREBP-1 - sterol regulator element binding protein 1.

TFAM - mitochondrial transcription factor A.

TOM20 - translocase of outer membrane 20.
